# Supplementary material for: The Association between Stressful Life Events and Emotional and Behavioral Problems in Children 0–7 Years Old: The CIKEO Study
Source: Int J Environ Res Public Health. 2022 Jan 31;19(3):1650. doi: 10.3390/ijerph19031650 (PMC8835208; doi:10.3390/ijerph19031650)
Supplement: Supplementary file 1 [file ijerph-19-01650-s001.zip › ijerph-1536905-supplementary.pdf]

**Supplementary Files:** The association between stressful life events and emotional and behavioral problems in children 0-7 years old: the CIKEO study

\*Corresponding author: Hein Raat, PhD, Department of Public Health, Erasmus University Medical Centre, Rotterdam, PO box 2040, 3000 CA Rotterdam, The Netherlands; Email: [h.raat@erasmusmc.nl](mailto:h.raat@erasmusmc.nl); ORCID: <https://orcid.org/0000-0002-6000-7445>

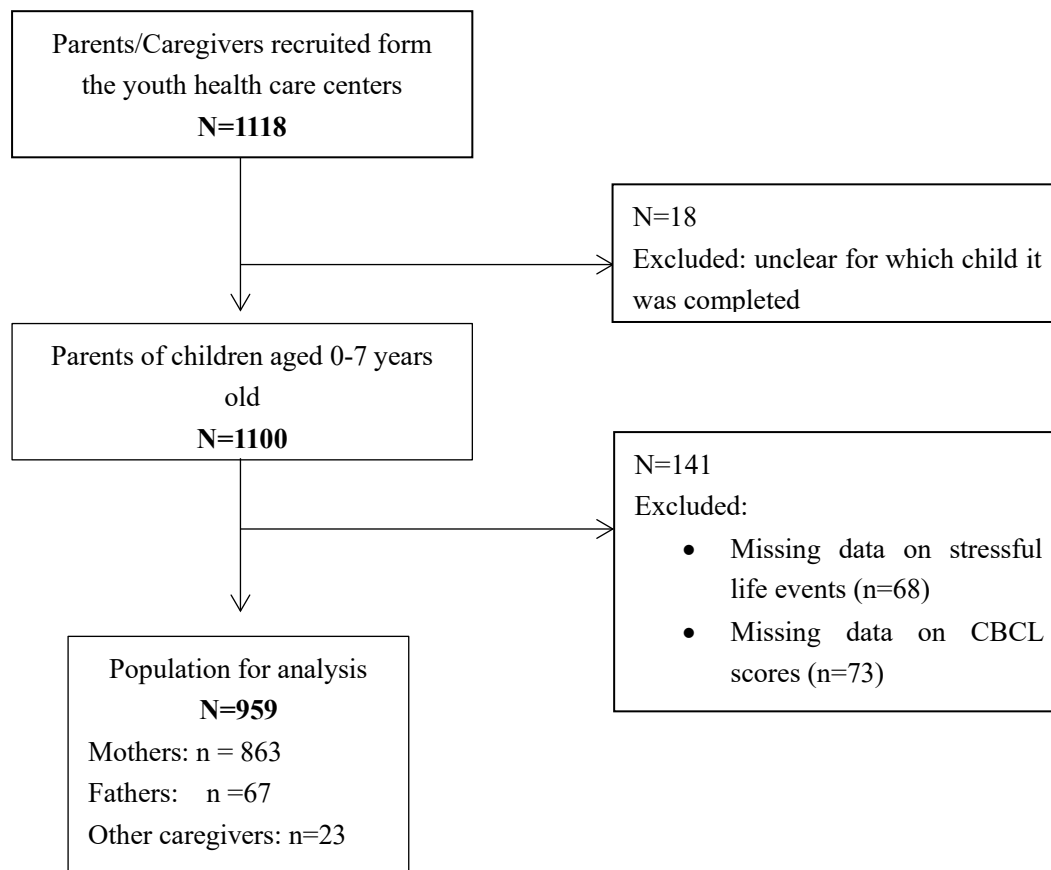

**Supplementary Figure S1.** Flowchart of participants included for analysis

**Supplementary Table S1.** Association between stressful life events (overall severity experience) and problem behaviors in children aged 0-7 years old (n=959)

|                                 | CBCL-T        |                                   | CBCL-E       |                                 | CBCL-I      |                                 |
|---------------------------------|---------------|-----------------------------------|--------------|---------------------------------|-------------|---------------------------------|
| Overall severity experience *   | Mean (SD)     | $\beta$ (95%CI) #                 | Mean (SD)    | $\beta$ (95%CI)                 | Mean (SD)   | $\beta$ (95%CI)                 |
| No-expose (N=232, 24.2%)        | 16.31 (14.98) | REF.                              | 7.22 (6.44)  | REF.                            | 3.79 (4.73) | REF.                            |
| Low (1-2, N=299, 31.2%)         | 19.02 (15.49) | <b><i>3.09 (0.56, 5.79)</i></b>   | 8.56 (7.07)  | <b><i>1.64 (0.51, 2.88)</i></b> | 4.30 (4.67) | 0.47 (-0.27, 1.23)              |
| Middle (3-5, N=246, 25.7%)      | 20.59 (15.46) | <b><i>4.13 (1.63, 7.03)</i></b>   | 8.74 (6.57)  | <b><i>1.60 (0.46, 2.83)</i></b> | 5.11 (5.11) | <b><i>1.26 (0.43, 2.12)</i></b> |
| High ( $\geq 6$ , N=182, 19.0%) | 27.27 (20.12) | <b><i>10.08 (6.85, 14.08)</i></b> | 11.52 (8.07) | <b><i>4.20 (2.76, 5.84)</i></b> | 6.57 (6.56) | <b><i>2.44 (1.47, 3.66)</i></b> |
| <b>P for trend</b>              |               | <0.05                             |              | <0.05                           |             | <0.05                           |

Note: \* Overall severity experience were calculated by summing the severity scores of all SLEs an individual experienced in the past 12 months; # derived from 2000 bootstrap samples with replacement. CBCL-T=Child Behavior Checklist Total Scale score, CBCL-E=Child Behavior Checklist Externalizing Subscale score, CBCL-I=Child Behavior Checklist Internalizing Subscale score; REF=reference; Adjusted for child age, sex, ethnic-background, respondents' age, sex, educational level, family composition, household income and recruitment methods; SLE= Stressful Life Events; bold and italic indicates  $p < 0.05$ .
